# Supplementary material
Source: MDPI journal article supplement (https://www.mdpi.com/2227-9717/9/10/1838)
Supplement: s1 [file s1]

**Table S1.** Photographs of different PLA films including up to 0.8 % (w/w) antioxidant plant extracts as described in section 3.1

|                                     | F1                                                                                  | F2                                                                                   | F3                                                                                    | F4                                                                                    | F5                                                                                    |
|-------------------------------------|-------------------------------------------------------------------------------------|--------------------------------------------------------------------------------------|---------------------------------------------------------------------------------------|---------------------------------------------------------------------------------------|---------------------------------------------------------------------------------------|
| <b>Aesculus hippocastanum (AEH)</b> |    |    |    |    |    |
| <b>Galanthus elwesii (GE)</b>       |    |    |    |    |    |
| <b>Thymus vulgaris (TV)</b>         |   |   |   |   |   |
| <b>Abies nordmanniana (AN)</b>      |  |  |  |  |  |
